# Supplementary material for: Cyb5r3 links FoxO1-dependent mitochondrial dysfunction with β-cell failure
Source: PubMed Central journal article supplement — Mol Metab. 2020 Feb 4;34:97–111. doi: 10.1016/j.molmet.2019.12.008 (PMC7031142; doi:10.1016/j.molmet.2019.12.008), 2020-02-04

## Supplemental Information

### Supplementary Figure 1. Adenovirus-mediated shCyb5r3 Knockdown, Related to

**Figure 2.** (A) *Cyb5r3* in Min6 cells transduced with shCyb5r3 vs. shScramble at varying MOIs. (B) *Cyb5r4* mRNA in the same samples as (A). (C) Densitometry of *Cyb5r3* protein levels in samples transduced with shScr vs. varying MOIs of shCyb5r3 adenovirus. (D) Western blot used for densitometry shown in (C). Rat Ins1 cells were used as a negative control for the mouse-specific shCyb5r3 sequence. (E) *Cyb5r3* mRNA in WT islets transduced with Ad-shScramble vs. Ad-shCyb5r3. All data are presented as means  $\pm$  SEM. \* $p < 0.05$ , \*\* $p < 0.01$ , \*\*\* $p < 0.001$  by Student's t-test. All experiments were performed at least 3 times in triplicate.

### Supplementary Figure 2. Metabolic Phenotyping of B-Cyb5r3 mice, Related to

**Figure 4.** (A-B) Body composition measured by MRI of B-Cyb5r3 vs. RIP-Cre<sup>+</sup> mice fed (A) normal chow and (B) HFD. (C-D) Oral glucose tolerance test (OGTT) of 4-month-old B-Cyb5r3 (C) female and (D) male mice fed normal chow. (E) Fasting and refed triglycerides and (F) non-esterified free fatty acids (NEFAs) in B-Cyb5r3 mice on normal chow. All data are presented as means  $\pm$  SEM. \* $p < 0.05$ , \*\* $p < 0.01$ , \*\*\* $p < 0.001$  by Student's t-test (n=4-6 per group).

### Supplementary Figure 3. *Cyb5r3* Expression and IPGTT in Male B-Cyb5r3 Mice,

**Related to Figures 3 and 4.** (A) Immunostaining of Insulin (red), *Cyb5r3* (green), Pdx1 (blue), and DAPI (white) in male B-Cyb5r3 pancreata (n=3 per group). (B) IPGTT in 8-month-old male B-Cyb5r3 mice vs. RIP-Cre<sup>+</sup> controls (n=4 per group). All data are presented as means  $\pm$  SEM. \* $p < 0.05$ , \*\* $p < 0.01$ , \*\*\* $p < 0.001$  by Student's t-test.

**Supplementary Figure 4. Islet Cell Quantification, Related to Figures 3 and 6. (A)**

Insulin, Glucagon, and Somatostatin + PP area normalized to total islet area as determined by immunohistochemistry. Data shown for 2-month-old and 6-month-old B-Cyb5r3 mice vs. RIP-Cre<sup>+</sup> controls. All data are presented as means  $\pm$  SEM. \*p < 0.05, \*\*p < 0.01, \*\*\*p < 0.001 by Student's t-test, (n=3 per group).

**Supplementary Figure 5. Forest plot of disease associations with rs5758837.**

The PheWAS graphic displays associations for a SNP in the *CYB5R3* promoter, rs5758837, across all phenotypes included in the Type 2 Diabetes Knowledge Portal, or across UK Biobank phenotypes [29].

**Supplementary Table 1 List of Antibodies Used**

| Antigen                | Species    | Dilution | Product Number | Company        |
|------------------------|------------|----------|----------------|----------------|
| Insulin                | Guinea Pig | 1:2000   | A0564          | DAKO           |
| Aldh1a3                | Rabbit     | 1:100    | NBP2-15339     | Novus          |
| Cyb5r3                 | Rabbit     | 1:100    | 10894-1-AP     | Proteintech    |
| Proglucagon            | Rabbit     | 1:500    | #8233          | Cell Signaling |
| Somatostatin           | Goat       | 1:1000   | SC-7819        | Santa Cruz     |
| Pancreatic Polypeptide | Goat       | 1:500    | AB77192        | Abcam          |
| Glut2                  | Rabbit     | 1:200    | AB54460        | Abcam          |
| MafA                   | Rabbit     | 1:200    | IHC00352       | Bethyl         |
| Pdx1                   | Goat       | 1:100    | AF2419         | R&D            |
| FoxO1                  | Rabbit     | 1:100    | CST 2880S      | Cell Signaling |
| Neurogenin3            | Rabbit     | 1:100    | AB2011         | BCBC           |

Figure S1

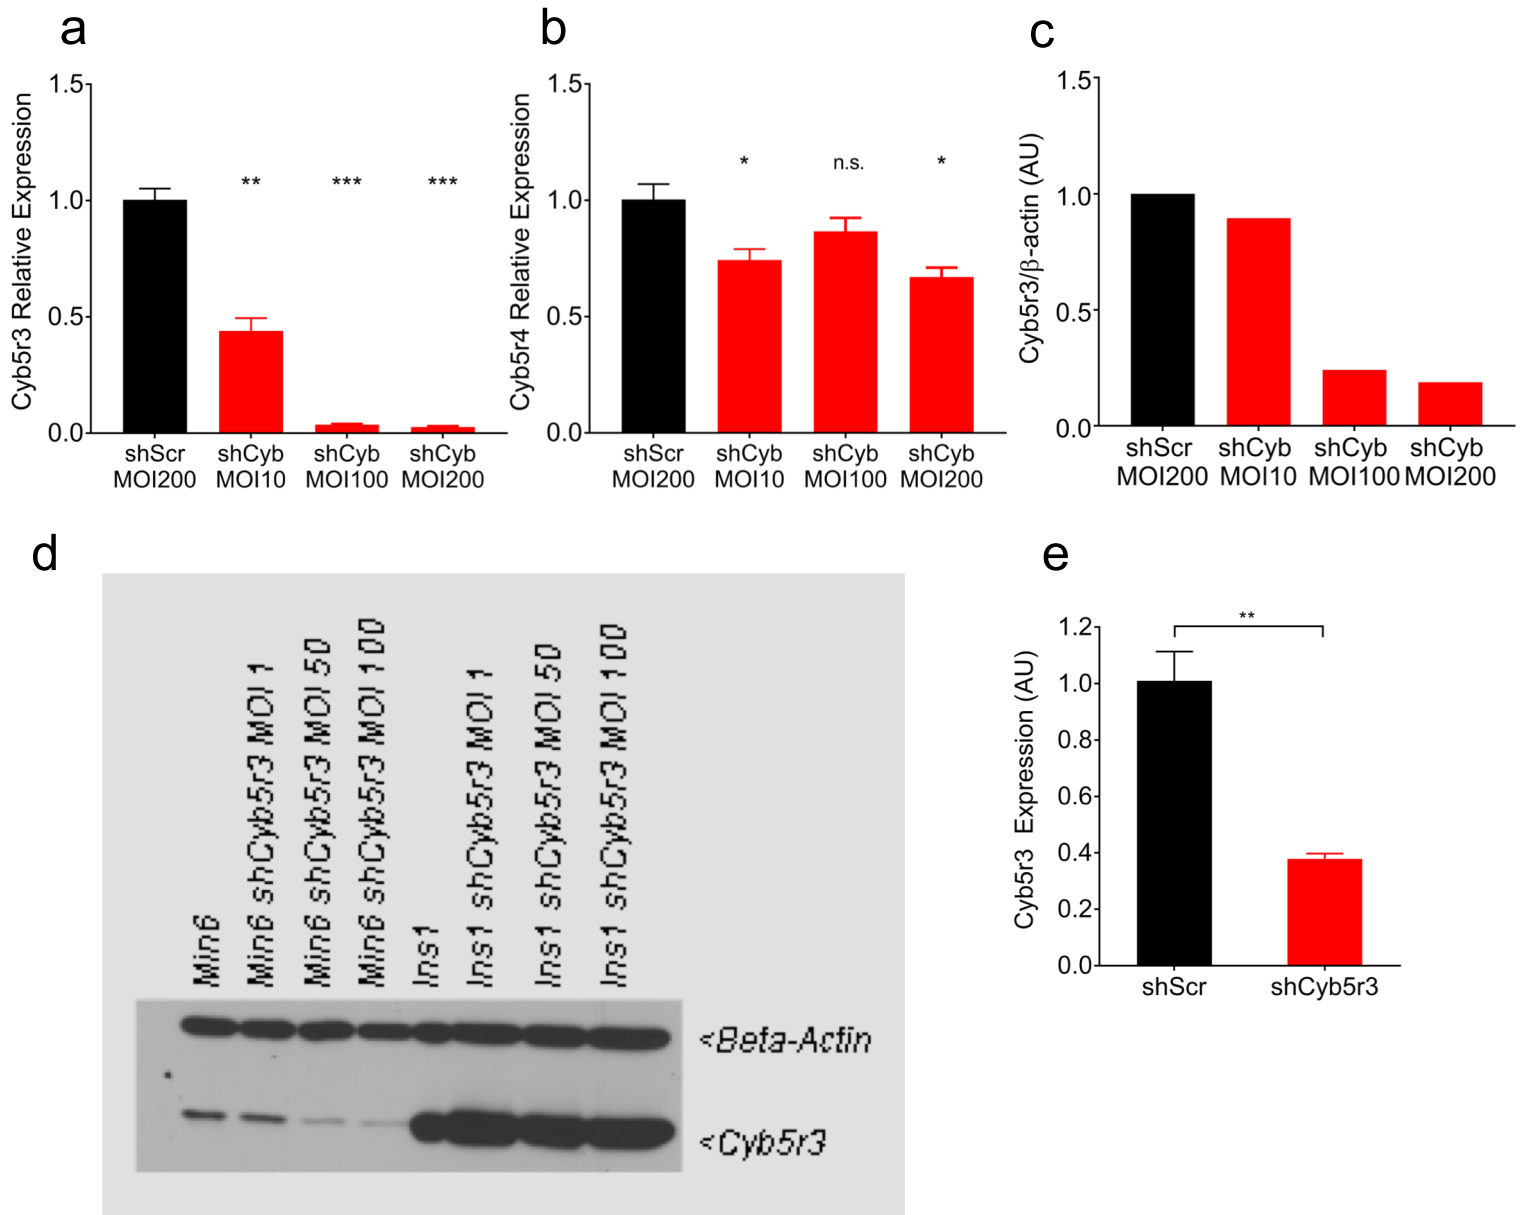

# Figure S2

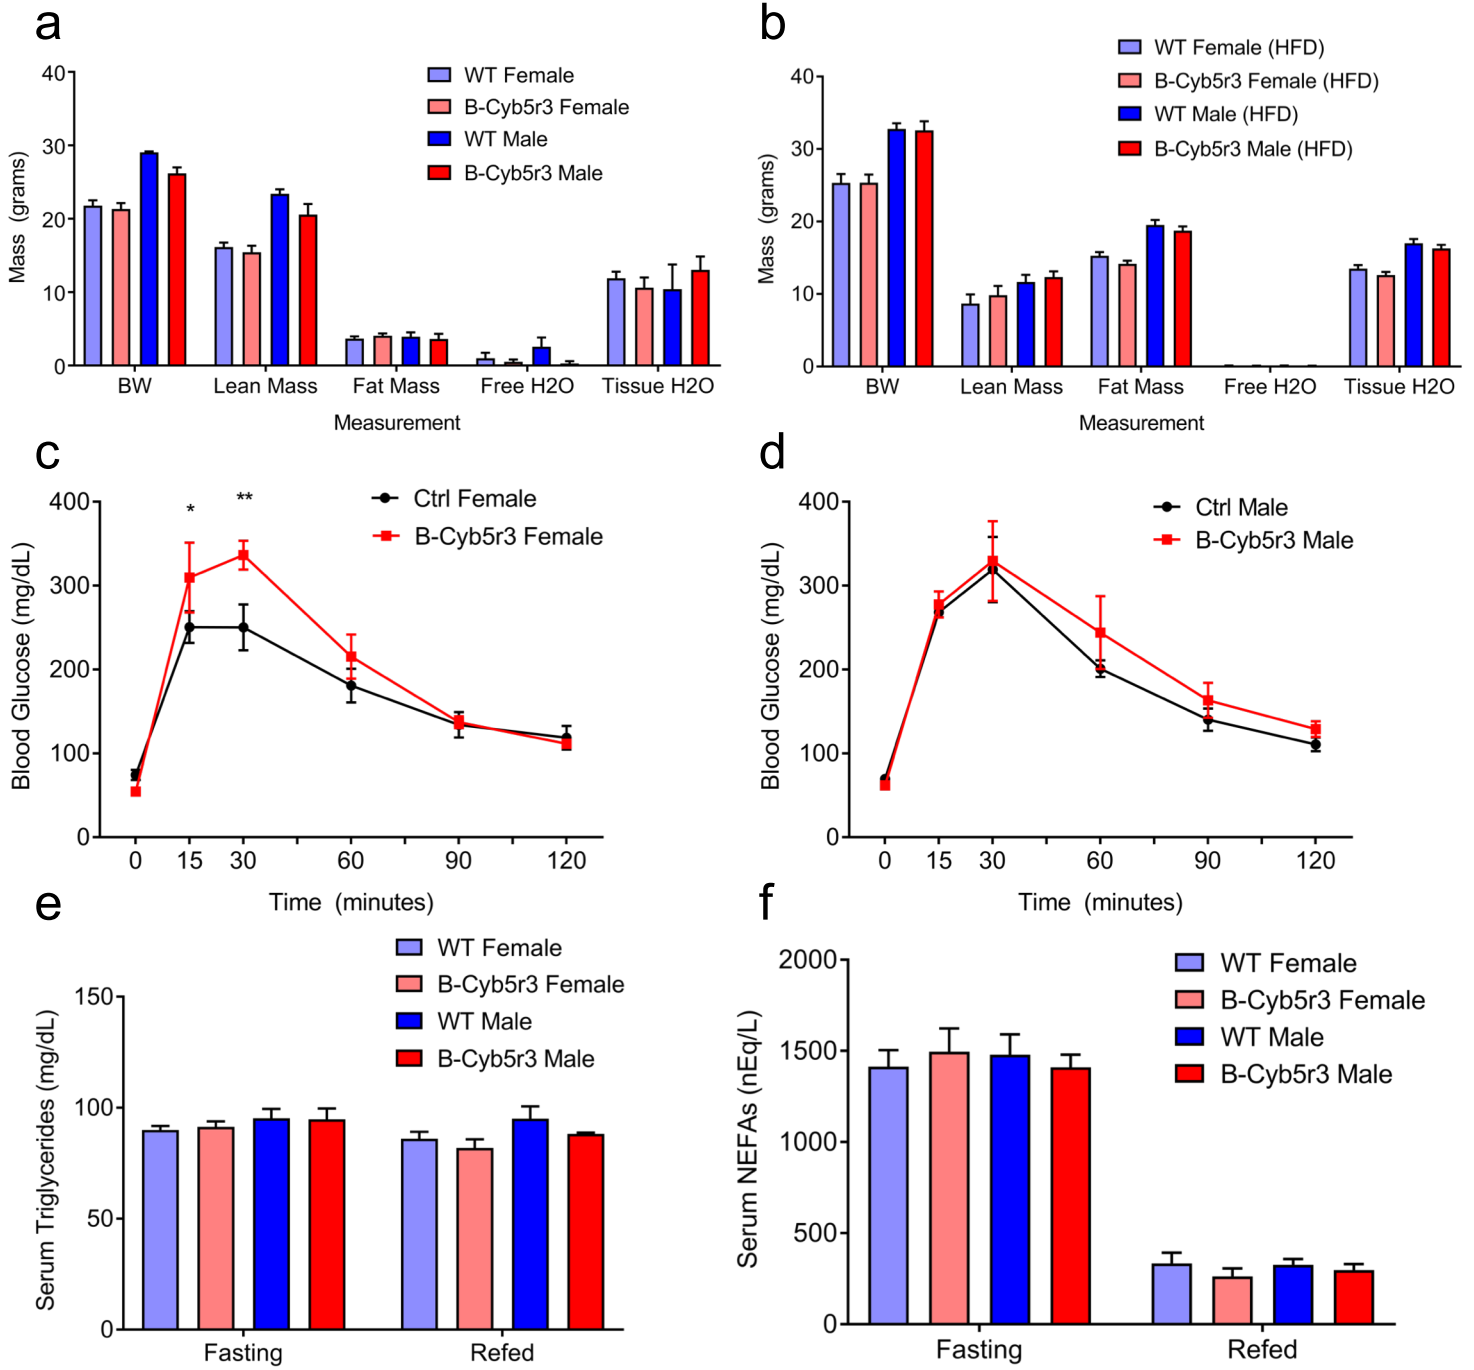

Figure S3

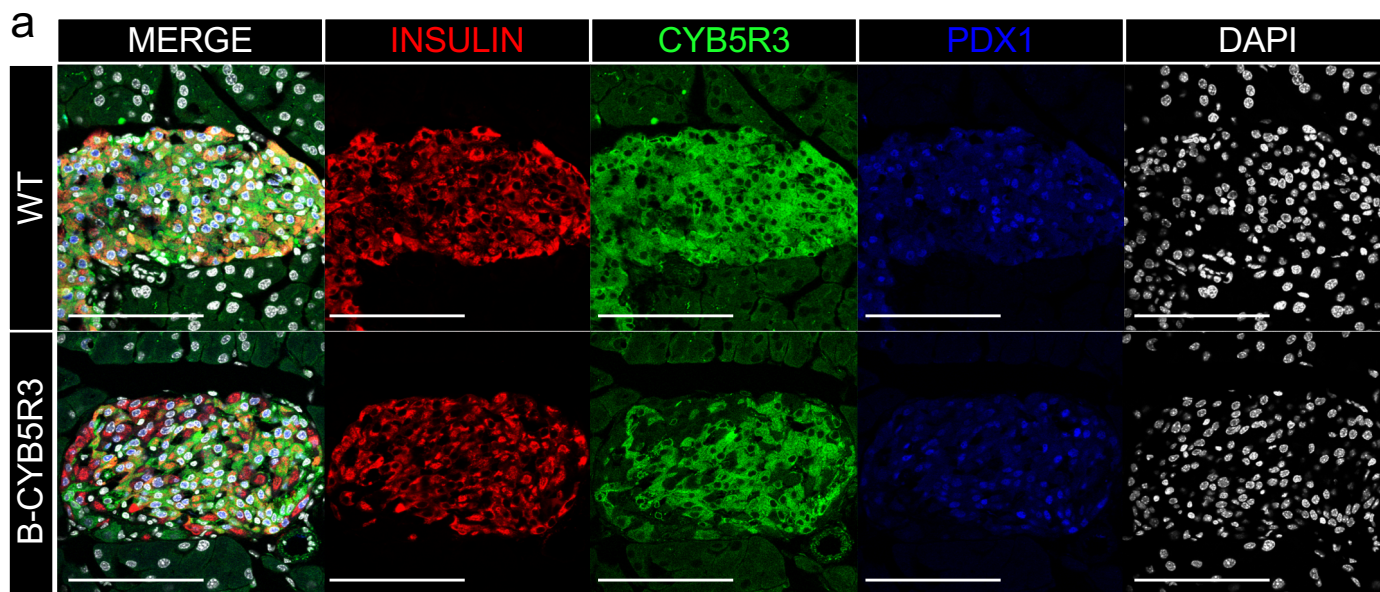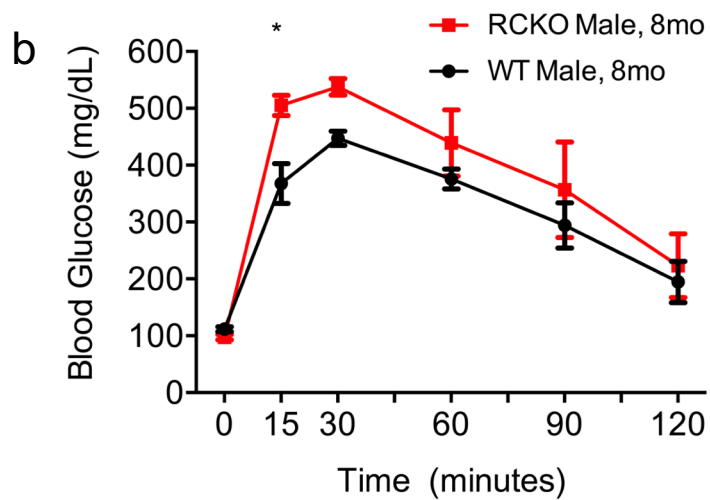

Figure S4

a 2 month-old

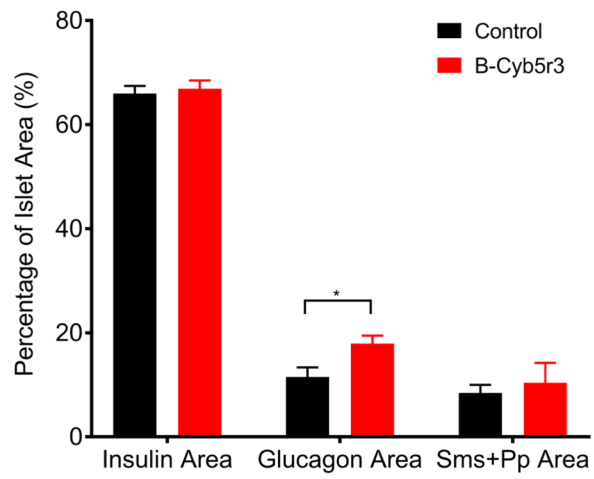

b 6 month-old

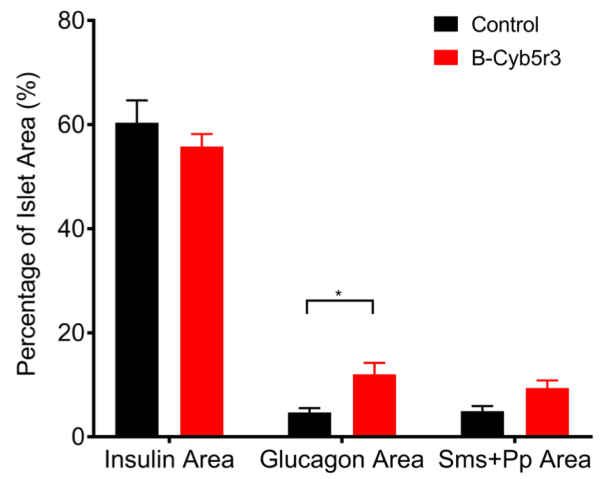

# Figure S5

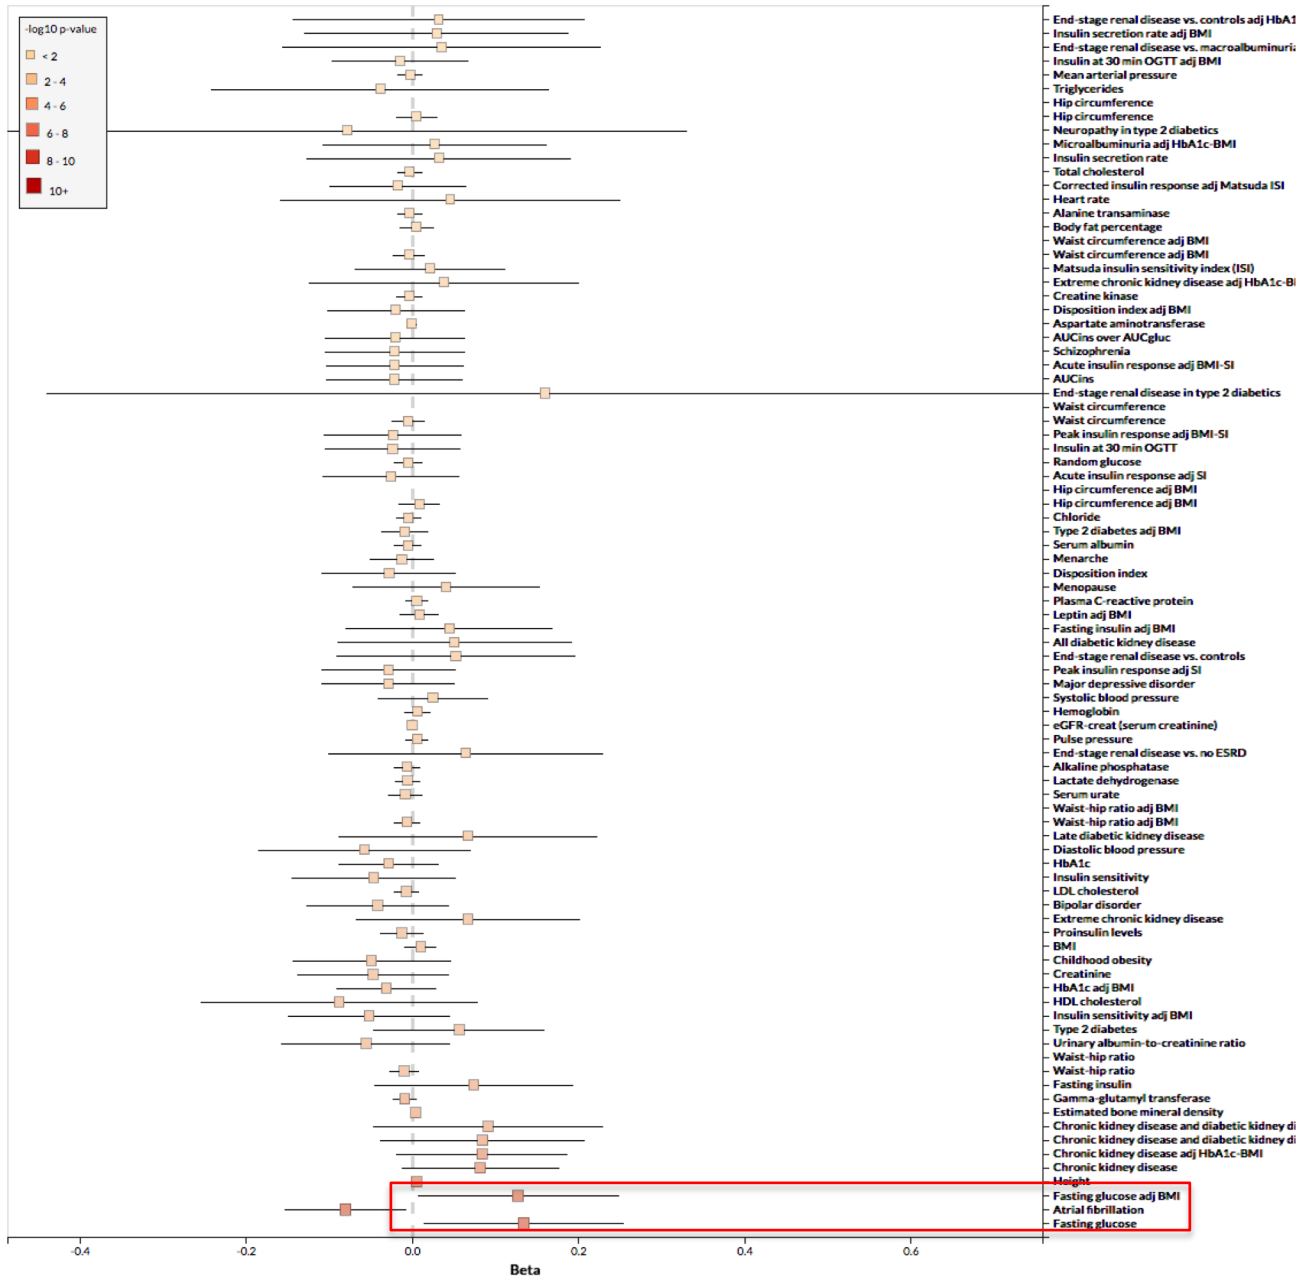

Supplement: mmc2.pdf [file mmc2.pdf]
